# Supplementary material
Source: ML conference proceedings conference paper supplement (https://openreview.net/forum?id=xCatVTpI4K)

$$x_1 \sim \pi_x^*$$

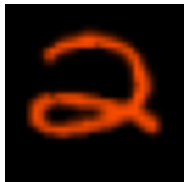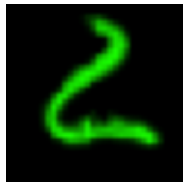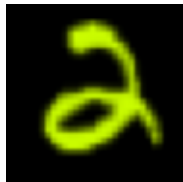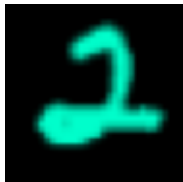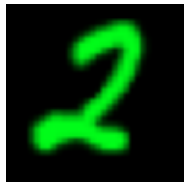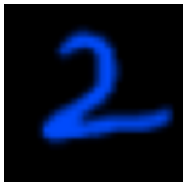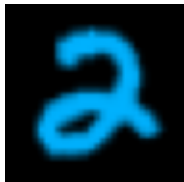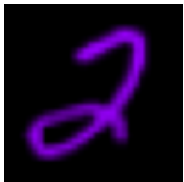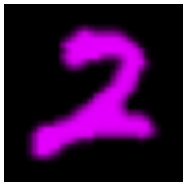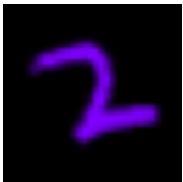

$$y_2 \sim \pi^*(\cdot|x_2)$$

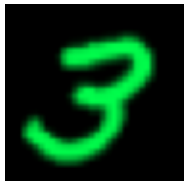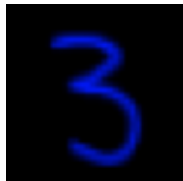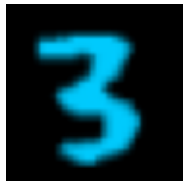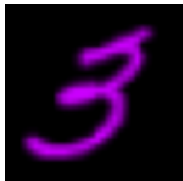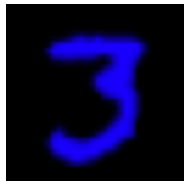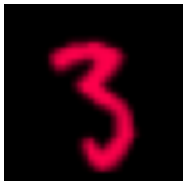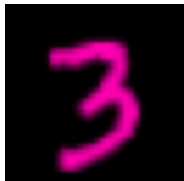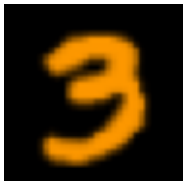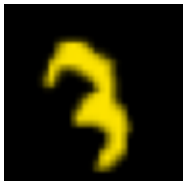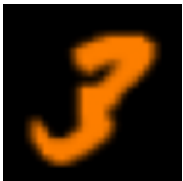

$$y_1 \sim \pi_{10}^\theta(\cdot|x_1)$$

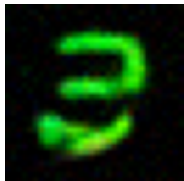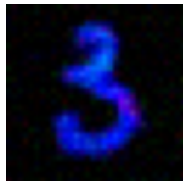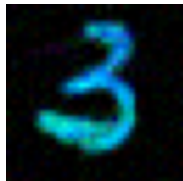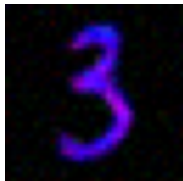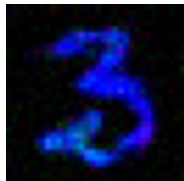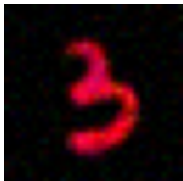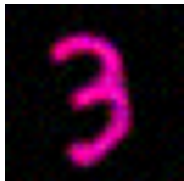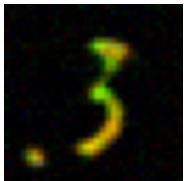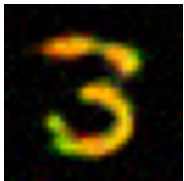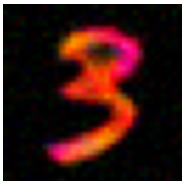

$$y_1 \sim \pi_{200}^\theta(\cdot|x_1)$$

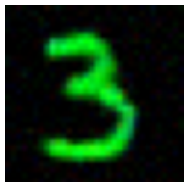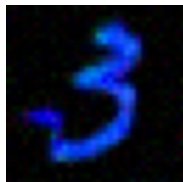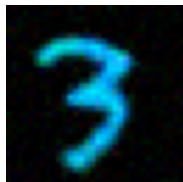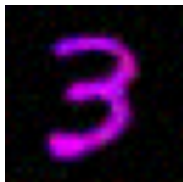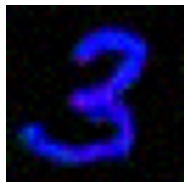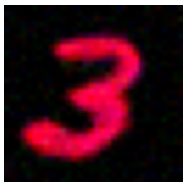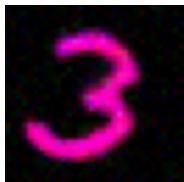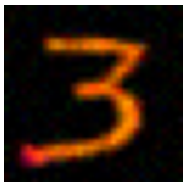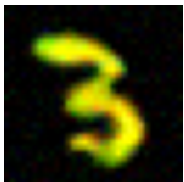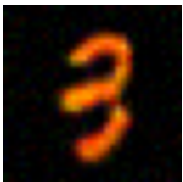

Supplement: supplementary_material [file EMB_mnist2to3_horizontal.pdf › Light-GCOT-EBM_ 2/mnist2to3/out_data/EMB_mnist2to3_horizontal.pdf]

$$x_1 \sim \pi_x^*$$

$$y_2 \sim \pi^*(\cdot|x_2) \quad y_1 \sim \pi_{10}^\theta(\cdot|x_1) \quad y_1 \sim \pi_{200}^\theta(\cdot|x_1)$$

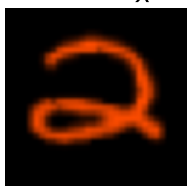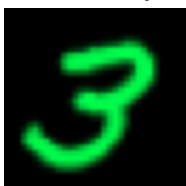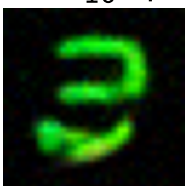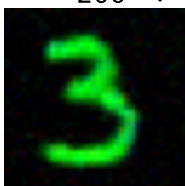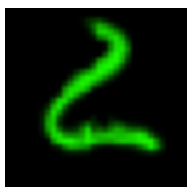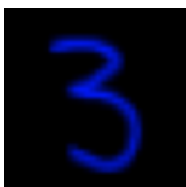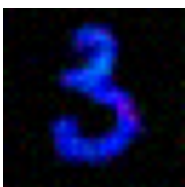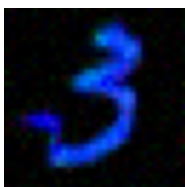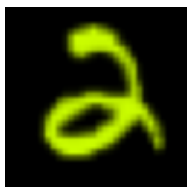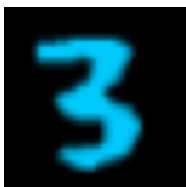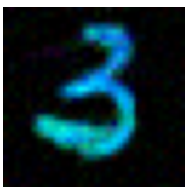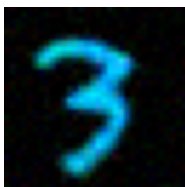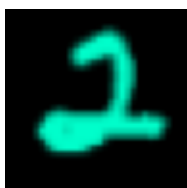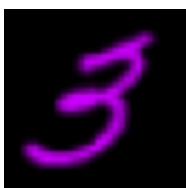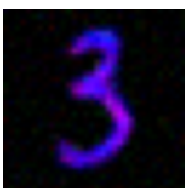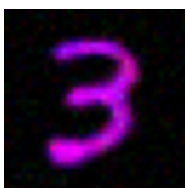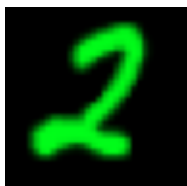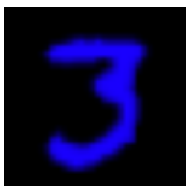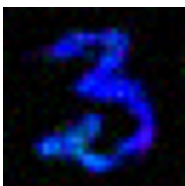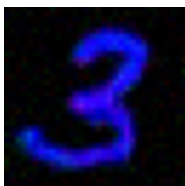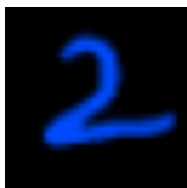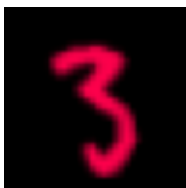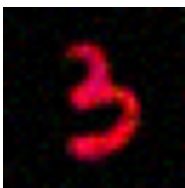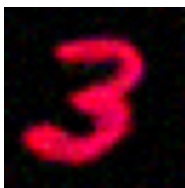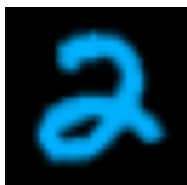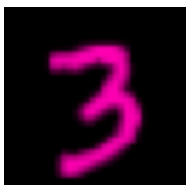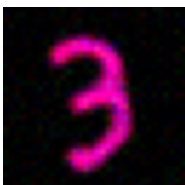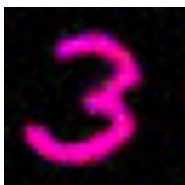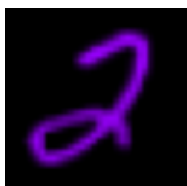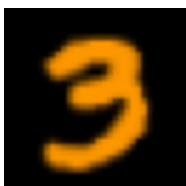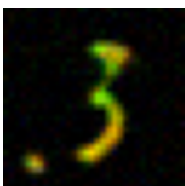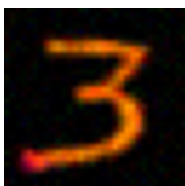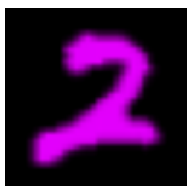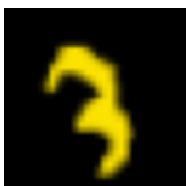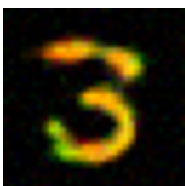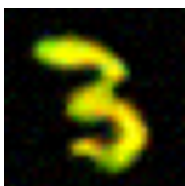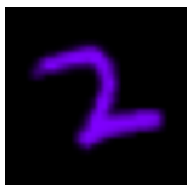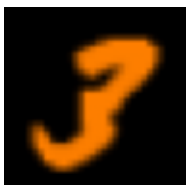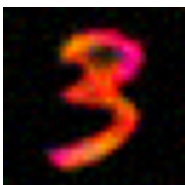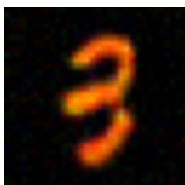

Supplement: supplementary_material [file EMB_mnist2to3_vertical.pdf › Light-GCOT-EBM_ 2/mnist2to3/out_data/EMB_mnist2to3_vertical.pdf]
